# Supplementary material for: Supramolecular liquid crystals of amide functionalized imidazolium saltsElectronic supplementary information (ESI) available: IR, proton and carbon NMR data for all compounds. See http://www.rsc.org/suppdata/jm/b2/b210562d/
Source: Royal Society of Chemistry journal article supplement (doi:10.1039/b210562d), 2003-03-04
Supplement: b210562d.doc [file b210562d.doc]

**IR, proton and carbon NMR data for all compounds**

**[C10, amide-im]Br：**1H NMR：9.13 (s,1H, CH), 7.86 (b, 1H, NH), 7.76 (s, 1H, CH), 7.69 (s, 1H, CH), 7.50 (b, 1H, NH), 4.94 (s, 2H, CH2), 4.18 (t, 3*J* = 7 Hz, 2H, CH2), 1.77 (m, 2H, CH2), 1.23 (m, 14H, CH2), 0.82 (t, 3*J* = 6 Hz, 3H, CH3)；13C NMR  (C=O), 137.20 (C2), 123.83, 121.61 (C4/C5), 50.46 (amido N-CH2), 48.76 (N-CH2), 29.31, 28.80, 28.74, 28.56, 28.27, 25.37, 21.99 (-CH2-), 13.85 (-CH3)；IR υmax/cm-1：3362 (s, -NH2), 1670 (s, C=O); Calcd. for C15H28N3OBr：C, 52.07; H, 8.14; N, 12.06. Found: C, 52.02; H, 8.15; N, 12.13 %.

**[C12, amide-im]Br：**1H NMR：9.15 (s,1H, CH), 7.88 (b, 1H, NH), 7.78 (s, 1H, CH), 7.70 (s, 1H, CH), 7.52 (b, 1H, NH), 4.96 (s, 2H, CH2), 4.19 (t, 3*J* = 7 Hz, 2H, CH2), 1.77 (m, 2H, CH2), 1.22 (m, 18H, CH2), 0.82 (t, 3*J* = 6 Hz, 3H, CH3)；13C NMR： 166.59，137.18，123.87，121.61，50.46，48.78，31.21，29.31，28.93，28.86，28.75，28.62，28.28，25.39，22.00，13.86；IR υmax/cm-1：3363 (s, NH2), 1670 (s, C=O)；Calcd. for C17H32N3OBr：C, 54.67; H, 8.64; N, 11.26. Found: C, 54.47; H, 8.60; N, 11.33 %.

**[C14, amide-im]Br：**1H NMR：9.28 (s,1H, CH), 7.86 (b, 1H, NH), 7.77 (s, 1H, CH), 7.69 (s, 1H, CH), 7.52 (b, 1H, NH), 4.94 (s, 2H, CH2), 4.19 (t, 3*J* = 7 Hz, 2H, CH2), 1.78 (m, 2H, CH2), 1.23 (m, 22H, CH2), 0.82 (t, 3*J* = 6 Hz, 3H, CH3)；13C NMR： 166.78，137.26，123.99，121.76，50.57，48.98，31.34，29.44，29.09，29.06，28.99，28.89，28.75，28.42，25.52，22.14，14.00；IR υmax/cm-1：3364 (s, NH2), 1671 (s, C=O)；Calcd. for C19H36N3OBr：C, 56.80; H, 9.08; N, 10.34. Found：C, 56.71; H, 9.02; N, 10.44 %.

**[C16, amide-im]Br：**1H NMR：9.15 (s,1H, CH), 7.87 (b, 1H, NH), 7.76 (s, 1H, CH), 7.70 (s, 1H, CH), 7.51 (b, 1H, NH), 4.95 (s, 2H, CH2), 4.19 (t, 3*J* = 7 Hz, 2H, CH2), 3.35 (m, 2H, CH2), 1.22 (m, 26H, CH2), 0.84 (t, 3*J* = 6 Hz, 3H, CH3)；13C NMR：166.59，137.17，123.88，121.60，50.45，48.78，31.21，29.32，28.97，28.76，28.61，28.29，25.40，22.00，13.85；IR υmax/cm-1：3370 (s, NH2), 1671 (s, C=O)；Calcd. for C21H40N3OBr: C, 58.60; H, 9.37; N, 9.78. Found: C, 58.59; H, 9.37; N, 9.76 %.

**[C18, amide-im]Br：**1H NMR：9.12 (s,1H, CH), 7.85 (b, 1H, NH), 7.77 (s, 1H, CH), 7.69 (s, 1H, CH), 7.51 (b, 1H, NH), 4.94 (s, 2H, CH2), 4.19 (t, 3*J* = 7 Hz, 2H, CH2), 1.77 (m, 2H, CH2), 1.22 (m, 30H, CH2), 0.84 (t, 3*J* = 6 Hz, 3H, CH3)；13C NMR：166.77，137.26，123.98，121.75，50.56，48.95，31.34，29.44，29.08，28.91，28.74，28.43，25.53，22.14，13.98；IR υmax/cm-1：3372 (s, NH2), 1671 (s, C=O)；Calcd. for C23H44N3OBr: C, 60.06; H, 9.60; N, 9.12. Found: C, 60.25; H, 9.67; N, 9.16%.

**[C10, amide-im]PF6：**1H NMR：9.09 (s,1H, CH), 7.83 (b, 1H, NH), 7.75 (s, 1H, CH), 7.68 (s, 1H, CH), 7.51 (b, 1H, NH), 4.92 (s, 2H, CH2), 4.18 (t, 3*J* = 7 Hz, 2H, CH2), 1.79 (m, 2H, CH2), 1.23 (m, 14H, CH2), 0.85 (t, 3*J* = 6 Hz, 3H, CH3)；13C NMR：166.39，137.21，123.94，121.61，50.45，48.83，31.23，29.32，28.83，28.77，28.60，28.29，25.40，22.03，13.88；IR υmax/cm-1：3456 (m, NH), 3346, 3329, 3290 (m, NH), 1712, 1682 (s, C=O)；Calcd. for C15H28N3O PF6: C, 43.78; H, 6.86; N, 10.22. Found: C, 43.84; H, 6.89; N, 10.17 %.

**[C12, amide-im]PF6：**1H NMR：9.09 (s,1H, CH), 7.83 (b, 1H, NH), 7.75 (s, 1H, CH), 7.68 (s, 1H, CH), 7.51 (b, 1H, NH), 4.92 (s, 2H, CH2), 4.18 (t, 3*J* = 7 Hz, 2H, CH2), 1.78 (m, 2H, CH2), 1.23 (m, 18H, CH2), 0.84 (t, 3*J* = 6 Hz, 3H, CH3)；13C NMR：166.64，137.21，123.94，121.61，50.44，48.81，31.25，29.33，28.97，28.89，28.78，28.66，28.31，25.41，22.05，13.90；IR υmax/cm-1：3455 (m, NH), 3349, 3320, 3289 (m, NH), 1728, 1682 (s, C=O)；Calcd. for C17H32N3O PF6: C, 46.45; H, 7.34; N, 9.56. Found: C, 46.44; H, 7.37; N, 9.56 %.

**[C14, amide-im]PF6：**1H NMR：9.09 (s,1H, CH), 7.83 (b, 1H, NH), 7.75 (s, 1H, CH), 7.68 (s, 1H, CH), 7.51 (b, 1H, NH), 4.92 (s, 2H, CH2), 4.18 (t, 3*J* = 7 Hz, 2H, CH2), 1.77 (m, 2H, CH2), 1.23 (m, 22H, CH2), 0.84 (t, 3*J* = 6 Hz, 3H, CH3)；13C NMR：166.63，137.22，123.95，121.62，50.45，48.83，31.25，29.34，29.01，28.97，28.90，28.79，28.66，28.31，25.43，22.05，13.90；IR υmax/cm-1：3454 (m, NH), 3345, 3314, 3284 (m, NH), 1698, 1682 (s, C=O)；Calcd. for C19H36N3O PF6: C, 48.80; H, 7.76; N, 8.99. Found: C, 48.98; H, 7.76; N, 9.01 %.

**[C16, amide-im]PF6：**1H NMR：9.09 (s,1H, CH), 7.83 (b, 1H, NH), 7.75 (s, 1H, CH), 7.68 (s, 1H, CH), 7.51 (b, 1H, NH), 4.92 (s, 2H, CH2), 4.18 (t, 3*J* = 7 Hz, 2H, CH2), 1.77 (m, 2H, CH2), 1.22 (m, 26H, CH2), 0.84 (t, 3*J* = 6 Hz, 3H, CH3)；13C NMR：166.63，137.22，123.95，121.62，50.46，48.83，31.25，29.34，29.01，28.91，28.80，28.66，28.32，25.43，22.05，13.88；IR υmax/cm-1：3454 (m, NH), 3345, 3323, 3291 (m, NH), 1714, 1682 (s, C=O)；Calcd. for C21H40N3O PF6: C, 50.88; H, 8.14; N, 8.48. Found: C, 50.90; H, 8.11; N, 8.44 %.

**[C18, amide-im]PF6：**1H NMR：9.09 (s,1H, CH), 7.83 (b, 1H, NH), 7.75 (s, 1H, CH), 7.68 (s, 1H, CH), 7.51 (b, 1H, NH), 4.92 (s, 2H, CH2), 4.18 (t, 3*J* = 7 Hz, 2H, CH2), 1.77 (m, 2H, CH2), 1.22 (m, 30H, CH2), 0.84 (t, 3*J* = 6 Hz, 3H, CH3)；13C NMR：166.62，137.21，123.94，121.62，50.45，48.82，31.24，29.33，28.99，28.90，28.79，28.65，28.32，25.43，22.04，13.89；IR υmax/cm-1：3454 (m, NH), 3345, 3320, 3295 (m, NH), 1719, 1682 (s, C=O)；Calcd. for C23H44N3O PF6: C, 52.74; H, 8.47; N, 8.03. Found: C, 52.71; H, 8.52; N, 8.02 %.

**[C10, amide-im]BF4：**1H NMR：9.09 (s,1H, CH), 7.82 (b, 1H, NH), 7.75 (s, 1H, CH), 7.67 (s, 1H, CH), 7.51 (b, 1H, NH), 4.92 (s, 2H, CH2), 4.18 (t, 3*J* = 7 Hz, 2H, CH2), 1.77 (m, 2H, CH2), 1.23 (m, 14H, CH2), 0.84 (t, 3*J* = 6 Hz, 3H, CH3)；13C NMR： 166.62，137.21，123.93，121.62，50.44，48.83，31.23，29.32，28.83，28.77，28.60，28.29，25.40，22.03，13.88；IR υmax/cm-1：3442 (m, NH), 3342 (m, NH), 1677 (s, C=O)；Calcd. for C15H28N3O BF4: C, 50.96; H, 7.99; N, 11.89. Found: C, 51.00; H, 7.91; N, 11.82 %.

**[C12, amide-im]BF4：**1H NMR ：9.09 (s,1H, CH), 7.82 (b, 1H, NH), 7.75 (s, 1H, CH), 7.67 (s, 1H, CH), 7.51 (b, 1H, NH), 4.92 (s, 2H, CH2), 4.18 (t, 3*J* = 7 Hz, 2H, CH2), 1.77 (m, 2H, CH2), 1.22 (m, 18H, CH2), 0.84 (t, 3*J* = 6 Hz, 3H, CH3)；13C NMR：13.87，22.02，25.40，28.29，28.64，28.76，28.87，28.94，29.31，31.22，48.81，50.43，121.61，123.92，137.19，166.61；IR υmax/cm-1：3441 (m, NH), 3341 (m, NH), 1677 (s, C=O)；Calcd. for C17H32N3O BF4: C, 53.51; H, 8.46; N, 11.02. Found: C, 53.51; H, 8.43; N, 10.87 %.

**[C14, amide-im]BF4：**1H NMR：9.09 (s,1H, CH), 7.82 (b, 1H, NH), 7.75 (s, 1H, CH), 7.67 (s, 1H, CH), 7.51 (b, 1H, NH), 4.92 (s, 2H, CH2), 4.18 (t, 3*J* = 7 Hz, 2H, CH2), 1.77 (m, 2H, CH2), 1.23 (m, 22H, CH2), 0.84 (t, 3*J* = 6 Hz, 3H, CH3)；13C NMR：166.62，137.20，123.93，121.62，50.44，48.82，31.23，29.32，28.99，28.95，28.88，28.77，28.64，28.30，25.41，22.03，13.88；IR υmax/cm-1：3438 (m, NH), 3341 (m, NH), 1675 (s, C=O)；Calcd. for C19H36N3O BF4: C, 55.71; H, 8.86; N, 10.26. Found: C, 55.69; H, 8.82; N, 10.06 %.

**[C16, amide-im]BF4：**1H NMR：9.09 (s,1H, CH), 7.82 (b, 1H, NH), 7.75 (s, 1H, CH), 7.68 (s, 1H, CH), 7.51 (b, 1H, NH), 4.92 (s, 2H, CH2), 4.18 (t, 3*J* = 7 Hz, 2H, CH2), 1.76 (m, 2H, CH2), 1.22 (m, 26H, CH2), 0.84 (t, 3*J* = 6 Hz, 3H, CH3)；13C NMR：166.62，137.20，123.93，121.62，50.44，48.82，31.25，29.35，29.00，28.92，28.81，28.66，28.33，25.44，22.04，13.87；IR υmax/cm-1：3434 (m, NH), 3339 (m, NH), 1675 (s, C=O)；Calcd. for C21H40N3O BF4: C, 57.62; H, 9.22; N, 9.61. Found: C, 57.39; H, 9.21; N, 9.53 %.

**[C18, amide-im]BF4：**1H NMR：9.09 (s,1H, CH), 7.82 (b, 1H, NH), 7.75 (s, 1H, CH), 7.67 (s, 1H, CH), 7.51 (b, 1H, NH), 4.92 (s, 2H, CH2), 4.18 (t, 3*J* = 7 Hz, 2H, CH2), 1.76 (m, 2H, CH2), 1.22 (m, 30H, CH2), 0.84 (t, 3*J* = 6 Hz, 3H, CH3)；13C NMR：166.62，137.21，123.94，121.63，50.45，48.83，31.25，29.34，29.01，28.91，28.80，28.66，28.33，25.43，22.05，13.88；IR υmax/cm-1：3433 (m, NH), 3339 (m, NH), 1678 (s, C=O)；Calcd. for C23H44N3O BF4: C, 59.31; H, 9.53; N, 9.03. Found: C, 59.25; H, 9.52; N, 9.06 %.
